# Supplementary material
Source: PubMed Central journal article supplement (PMC8733075)

**Supplementary Fig. S3** Change over time in (A) diastolic BP and (B) systolic BP (FAS). Closed circles = supervised exercise group; open squares = standard therapy group. BP, blood pressure; FAS, full analysis set; SD, standard deviation

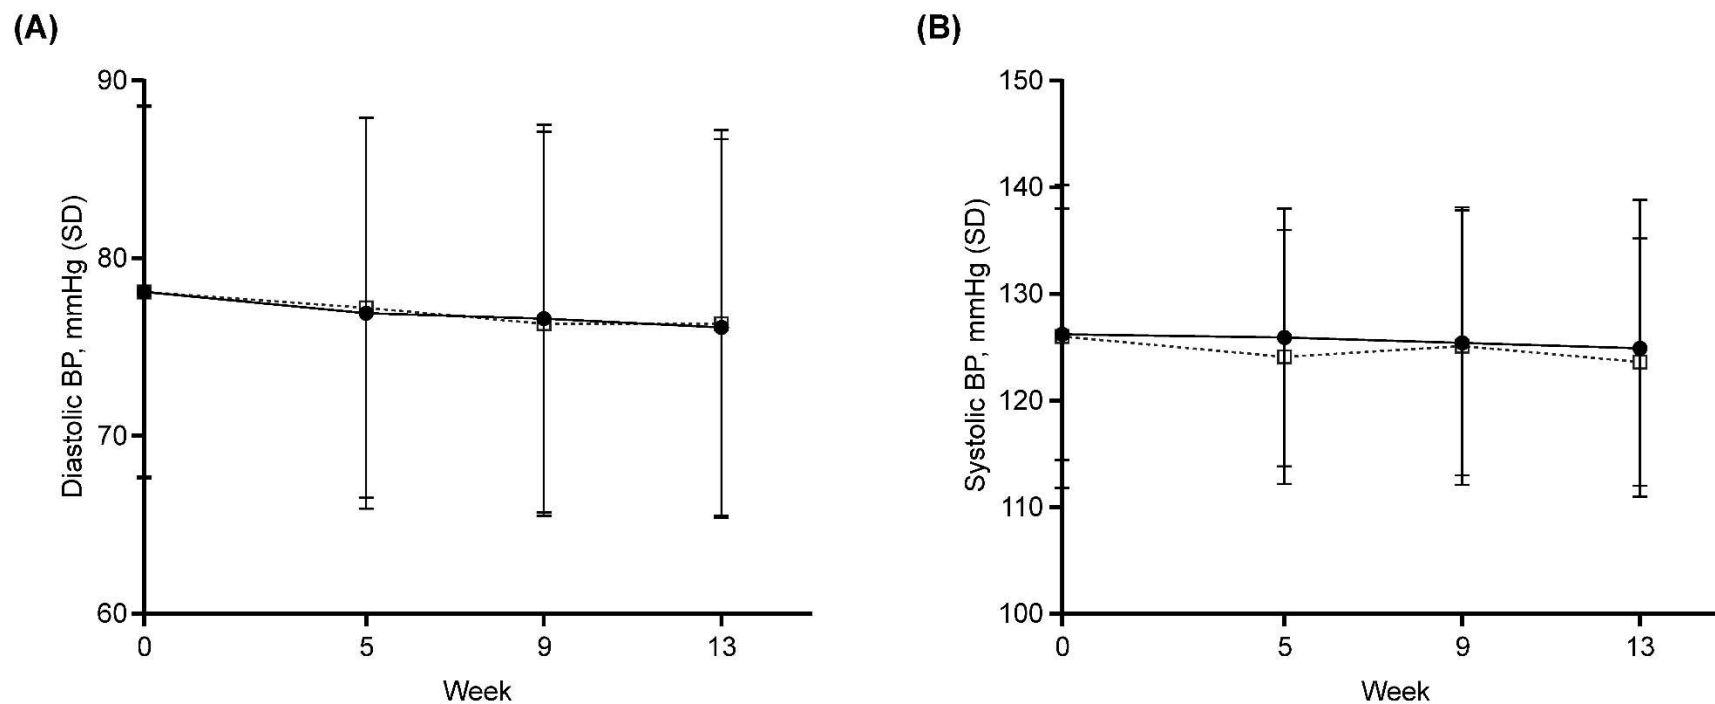

Supplement: 13340_2021_506_MOESM3_ESM.pdf [file 13340_2021_506_MOESM3_ESM.pdf]
