# Supplementary material
Source: PubMed Central journal article supplement (PMC8733075)
Supplement: 13340_2021_506_MOESM5_ESM.pdf [file 13340_2021_506_MOESM5_ESM.pdf]

**Supplementary Table S1** Supervised exercise program

| Period                 |                           | Initial                       | Titration                                          | Maintenance                   |
|------------------------|---------------------------|-------------------------------|----------------------------------------------------|-------------------------------|
| Weeks                  |                           | 1–2                           | 3–4                                                | 5–12                          |
| Aerobic<br>exercise    | Exercise intensity        | Light                         | Moderate                                           | Vigorous                      |
|                        | Frequency and<br>duration | 3 days/week, 30 minutes       | 3 days/week, 30 minutes                            | 3 days/week, 30 minutes       |
|                        | Type of activity          | Running or cycling            | Running or cycling                                 | Running or cycling            |
| Resistance<br>exercise | Exercise intensity        | Moderate to vigorous          | Moderate to vigorous                               | Moderate to vigorous          |
|                        | Frequency                 | 3 days/week                   | 3 days/week                                        | 3 days/week                   |
|                        | Repeats and sets          | 10 repeats x 2 sets           | 10 repeats x 3 sets                                | 10 repeats x 3 sets           |
|                        |                           | (1-minute break between sets) | (1-minute break between sets)                      | (1-minute break between sets) |
|                        | Type of activity          | Leg press                     | Leg press                                          | Leg press                     |
| Chest press            |                           | Chest press                   | Chest press                                        |                               |
| Lateral pulldown       |                           | Lateral pulldown              | Lateral pulldown                                   |                               |
| Abdominal crunches     |                           | Abdominal crunches            | Abdominal crunches +<br>leg curl<br>Shoulder press |                               |
