# Supplementary material
Source: PubMed Central journal article supplement (PMC8733075)
Supplement: 13340_2021_506_MOESM6_ESM.pdf [file 13340_2021_506_MOESM6_ESM.pdf]

**Supplementary Table S2** Antidiabetic drug therapy

| <b>Antidiabetic drug class<sup>a</sup>, n (%)</b> | <b>Supervised exercise<br/>(N=110)</b> | <b>Standard therapy<br/>(N=114)</b> |
|---------------------------------------------------|----------------------------------------|-------------------------------------|
| Any antidiabetic drug therapy                     | 85 (77.3)                              | 87 (76.3)                           |
| Biguanides                                        | 56 (50.9)                              | 59 (51.8)                           |
| DPP-4 inhibitors                                  | 56 (50.9)                              | 56 (49.1)                           |
| SGLT2 inhibitors                                  | 37 (33.6)                              | 45 (39.5)                           |
| $\alpha$ -Glucosidase inhibitors                  | 6 (5.5)                                | 7 (6.1)                             |
| GLP-1 receptor agonists                           | 5 (4.5)                                | 5 (4.4)                             |
| Thiazolidinediones                                | 4 (3.6)                                | 6 (5.3)                             |
| Rapid-acting insulin secretagogues<br>(glinides)  | 0                                      | 1 (0.9)                             |

Abbreviations: DPP-4, dipeptidyl peptidase-4; GLP-1, glucagon-like peptide-1; SGLT2, sodium/glucose cotransporter 2.

<sup>a</sup>Patients who received combinations of drugs from different classes are counted within each class.
